# Supplementary material
Source: PubMed Central journal article supplement (PMC5121393)

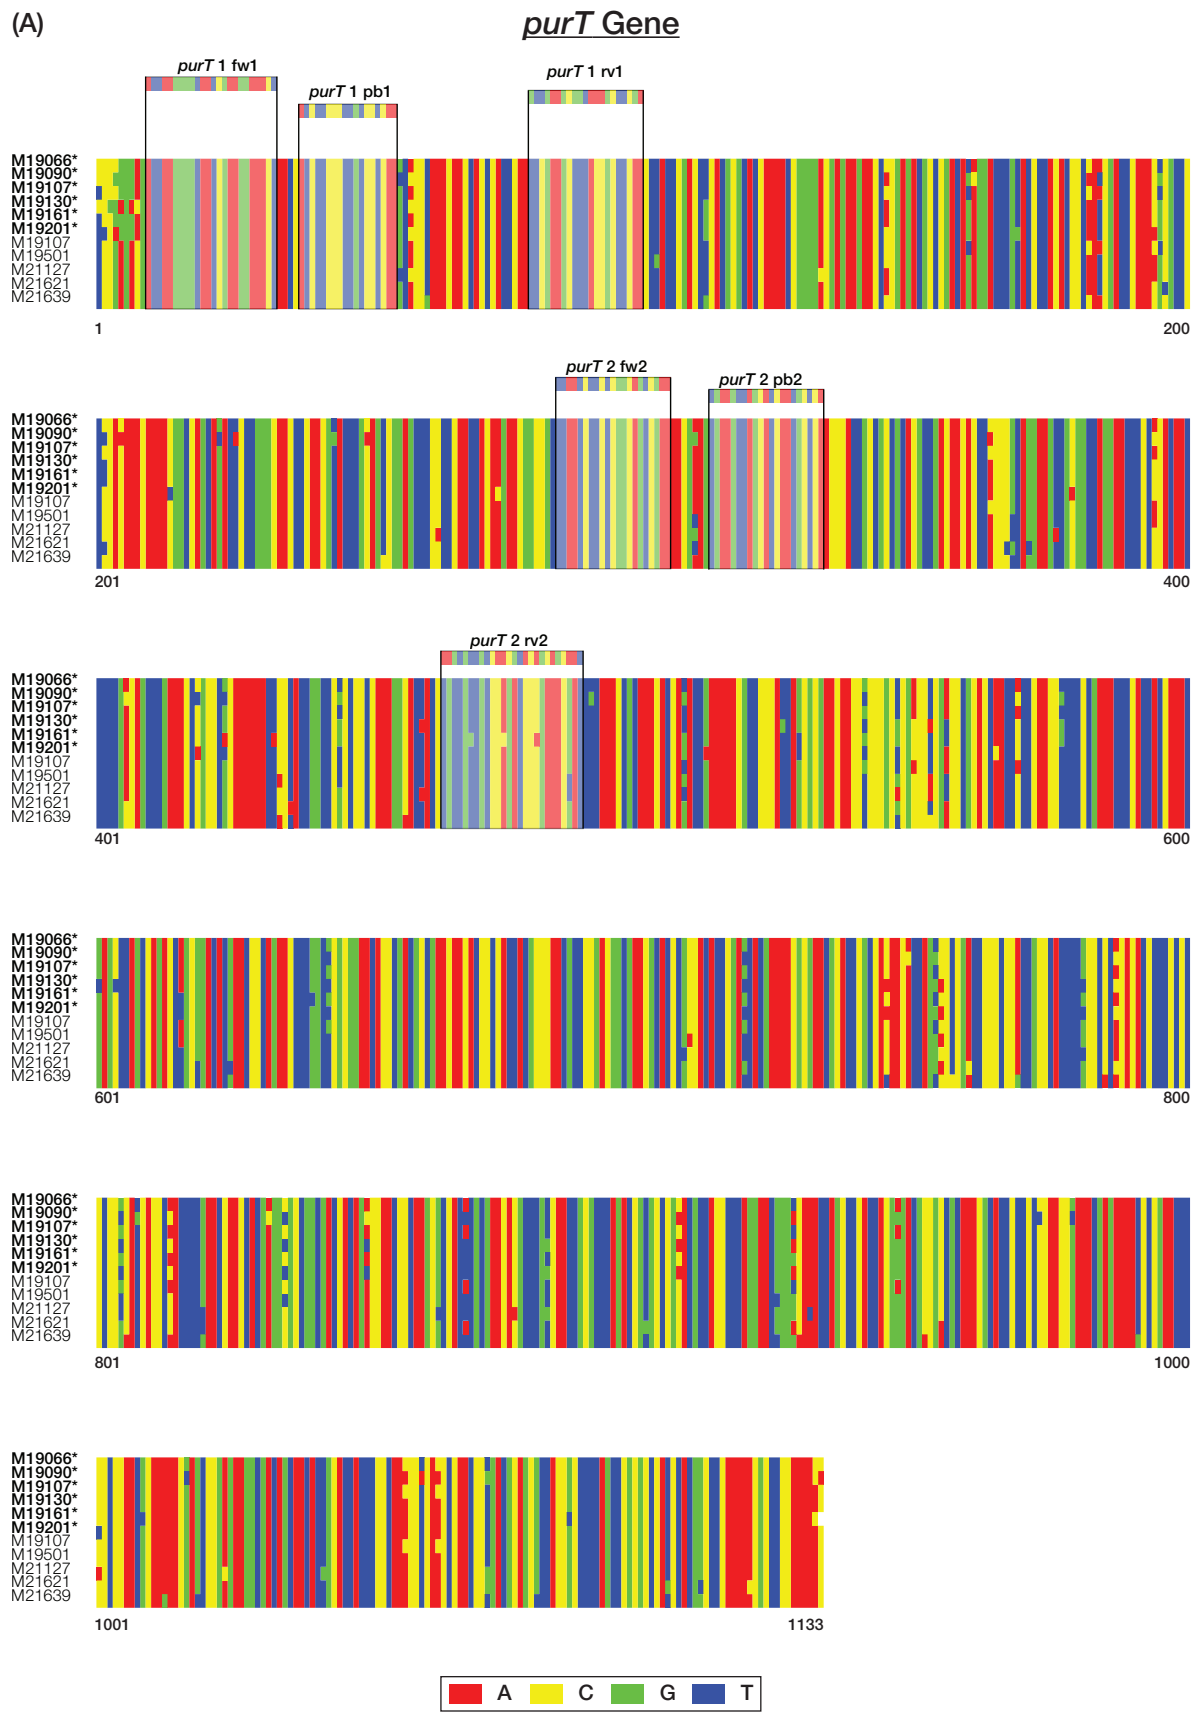

Supplementary Figure 1. **Alignments of *Haemophilus haemolyticus* specific potential rt-PCR target genes.** Alignments for (A) *purT*, (B) *hdg* and (C) *sod* include sequences taken from the genomes analyzed here as well as Sanger sequences (**bold with \***) of gene amplicons from additional strains. The locations of primers and probes for the *purT* rt-PCR assays are shown above the alignment.

(B)

*hpd* Gene

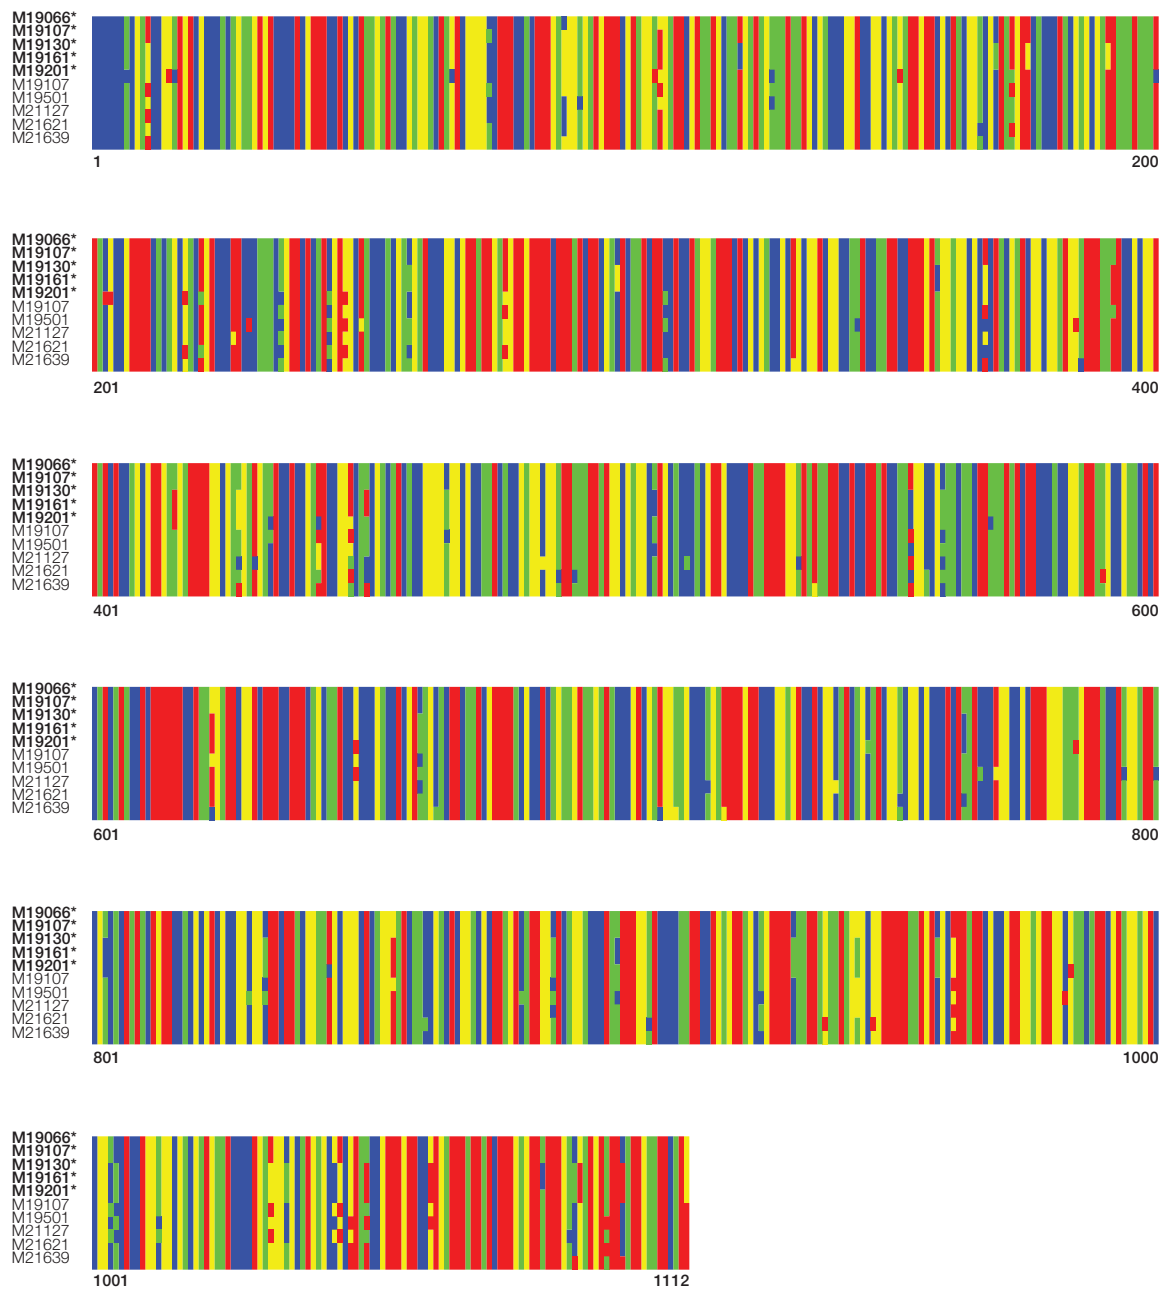

(C)

sod Gene

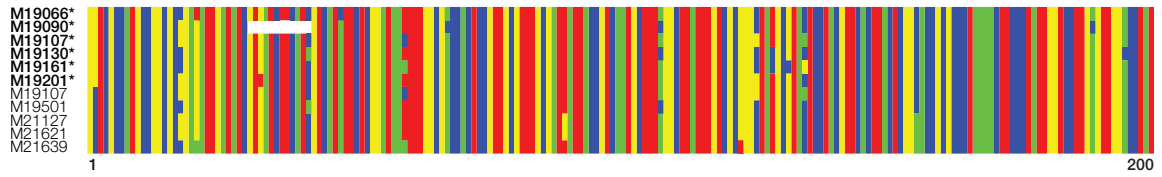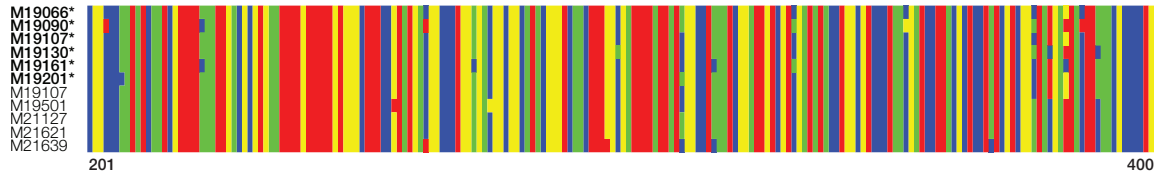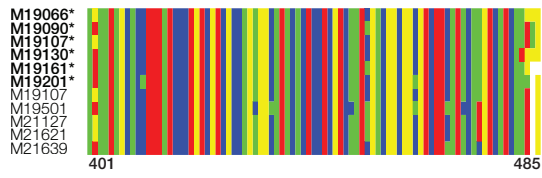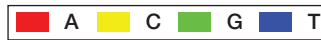

Supplement: JCM.01511-16_zjm999095240so1.pdf [file JCM.01511-16_zjm999095240so1.pdf]
